# Supplementary material for: Synergistic degradation of PNP via coupling H2O2 with persulfate catalyzed by nano zero valent iron
Source: Royal Society of Chemistry journal article supplement (doi:10.1039/c9ra02901j), 2019-01-01
Supplement: c9ra02901j1.pdf [file c9ra02901j1.pdf]

**Supporting Materials for**

**Synergistic degradation of PNP via coupling H<sub>2</sub>O<sub>2</sub> with  
persulfate catalyzed by nano zero valent iron**

Jiangkun Du <sup>a</sup>, Yang Wang <sup>a</sup>, Faheem <sup>a</sup>, Tiantian Xu <sup>a</sup>, Han Zheng <sup>b</sup>, Jianguo Bao <sup>\*, a</sup>

a. School of Environmental Studies, China University of Geosciences,

Wuhan 430074, P. R. China

b. Hubei Provincial Key Laboratory of Mining Area Environmental Pollution Control and  
Remediation, Hubei Polytechnic University, Huangshi, People's Republic of China

\*Corresponding author:

Dr. Jianguo Bao

Email: [bjianguo@cug.edu.cn](mailto:bjianguo@cug.edu.cn), Tel. (+82)-2-9585426; Fax (+82)-2-9585447

Fig. S1

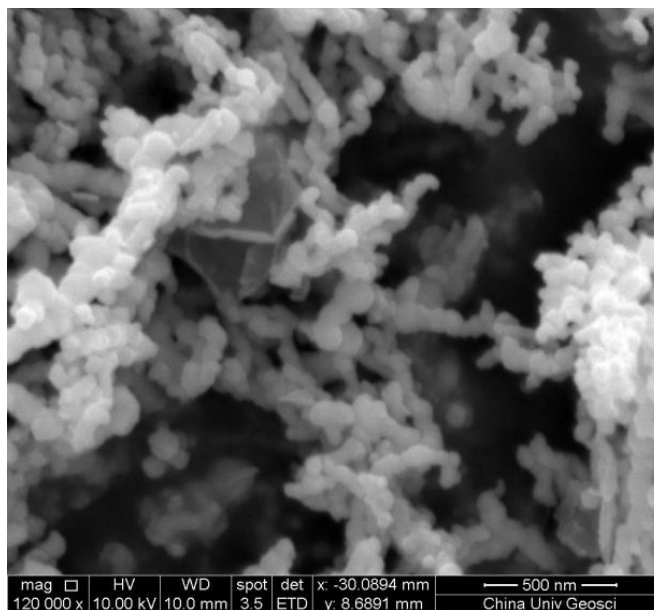

Fig.S1 The SEM image of nZVI.

Fig. S2

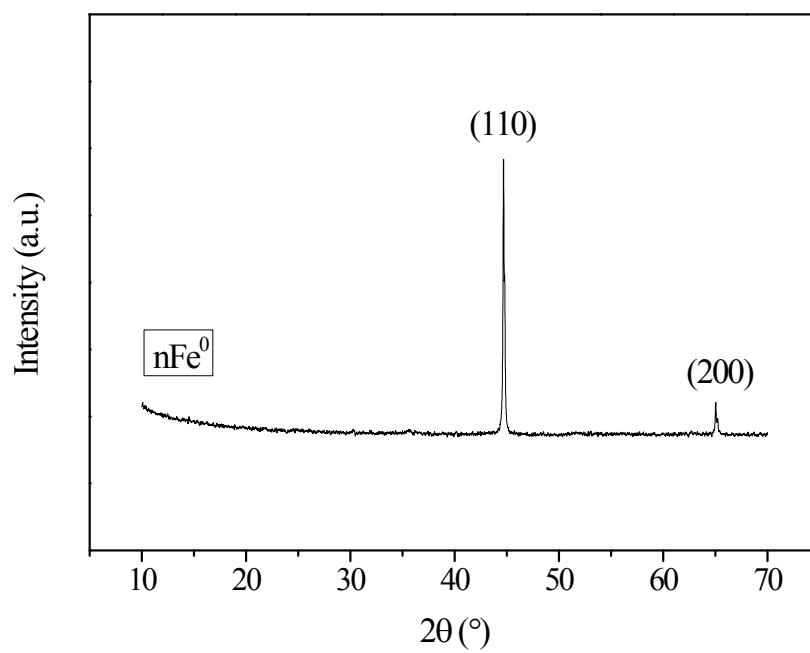

Fig.S2 The XRD pattern of nZVI.

Fig. S3

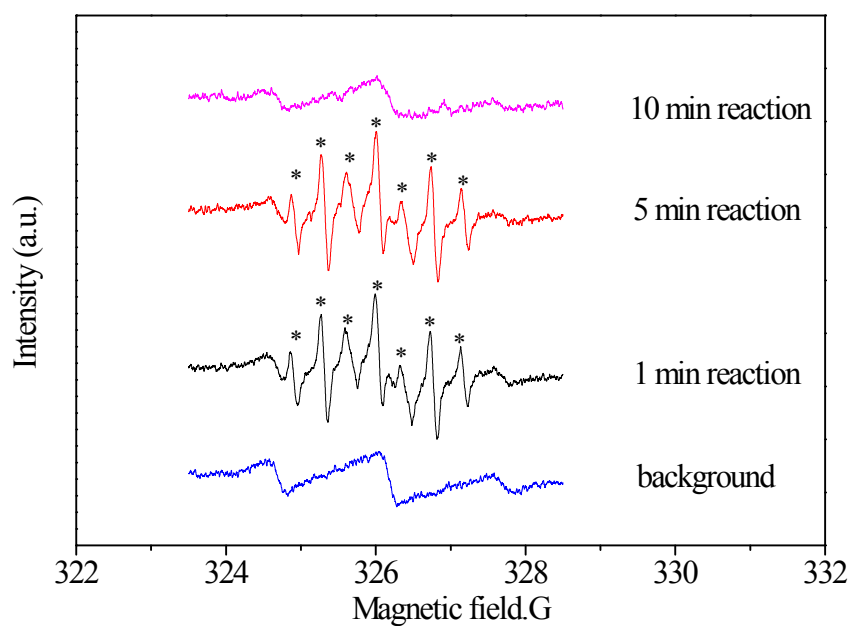

Fig.S3 EPR spectra obtained for nZVI/PDS/H<sub>2</sub>O<sub>2</sub> dual oxidation systems. Reaction condition: [nZVI]<sub>0</sub>=0.2 g/L, [PNP]<sub>0</sub>=20 mg/L, [H<sub>2</sub>O<sub>2</sub>/PDS (1:1)]<sub>0</sub> = 2 mmol/L.

Fig. S4

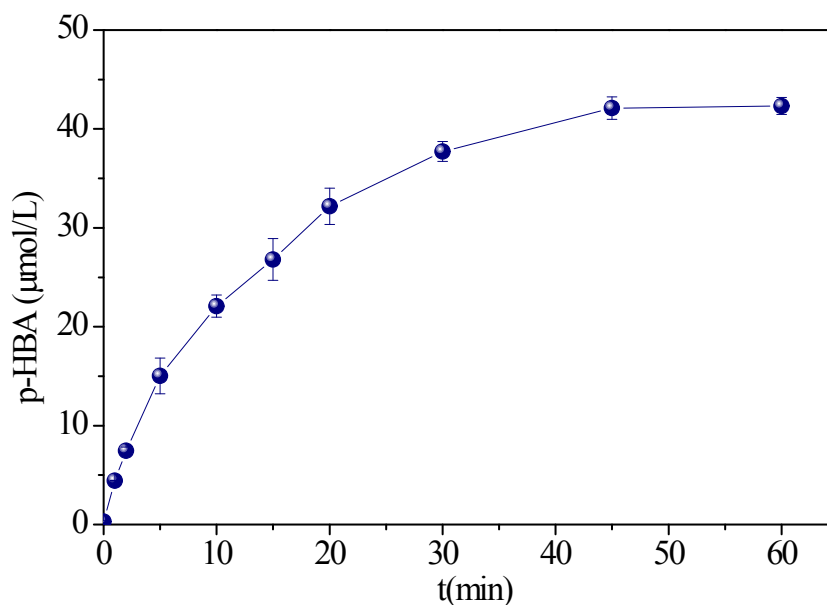

Fig.S4 Time-profile production of p-HBA from the oxidation of BA in the nZVI/PDS/H<sub>2</sub>O<sub>2</sub> system. Reaction condition: [nZVI]<sub>0</sub>=0.2 g/L, [PNP]<sub>0</sub>=20 mg/L, [H<sub>2</sub>O<sub>2</sub>/PDS (1:1)]<sub>0</sub> = 2 mmol/L, [BA]=5 mmol/L, initial pH=7.

Fig. S5

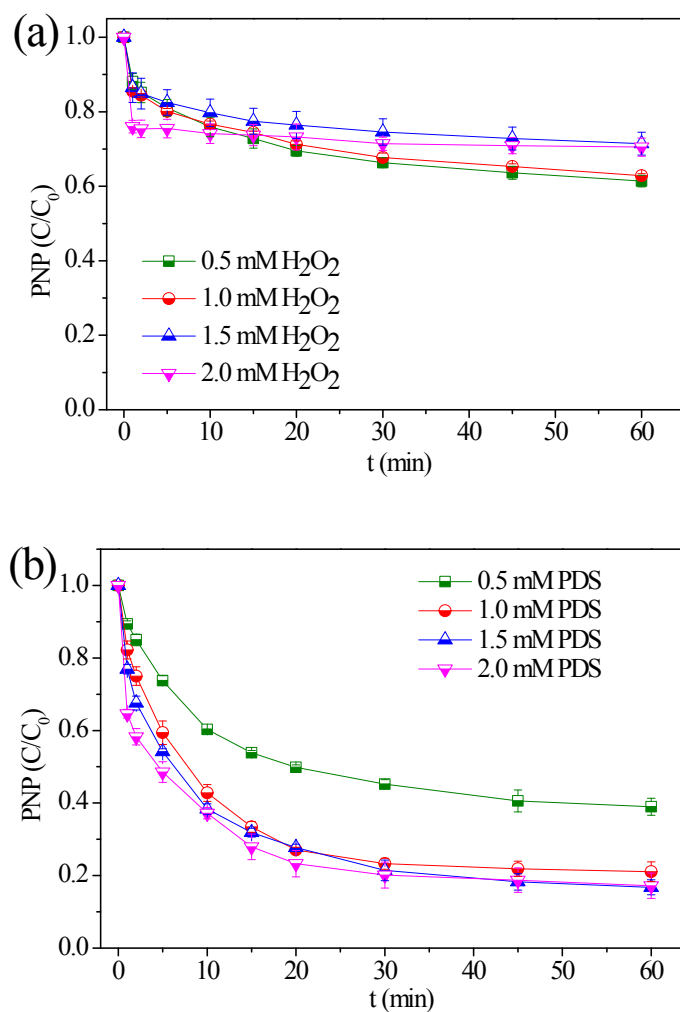

Fig.S5 PNP degradation in nZVI/H<sub>2</sub>O<sub>2</sub> and nZVI/PDS oxidation systems with different oxidant dosage. Reaction condition: [nZVI]<sub>0</sub> = 0.2 g/L, [PNP]<sub>0</sub> = 20 mg/L, initial pH=7.

Fig. S6

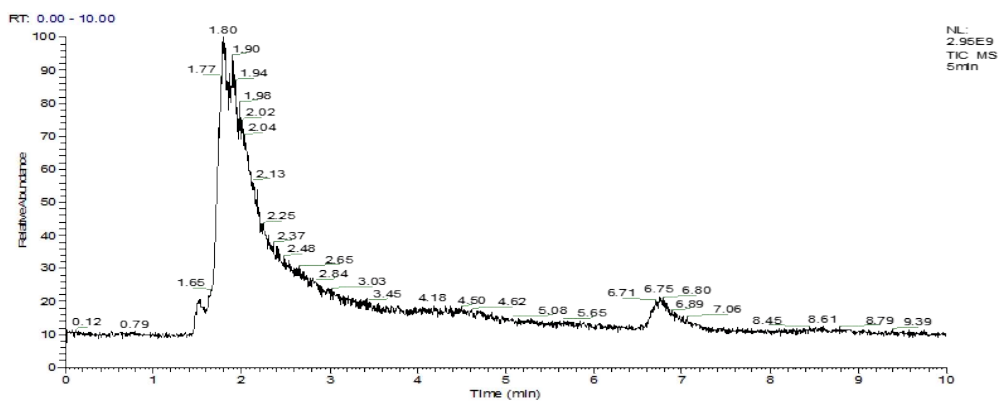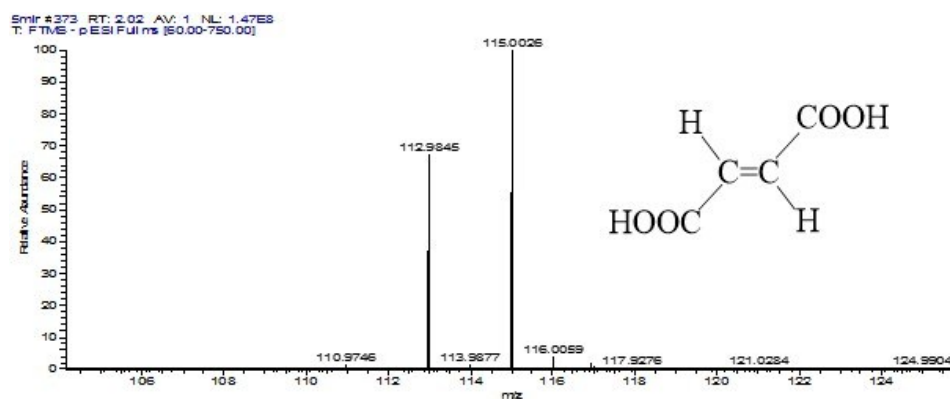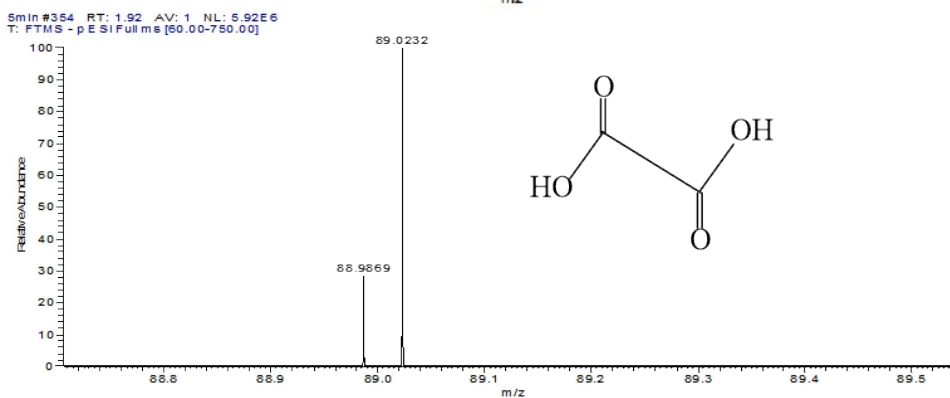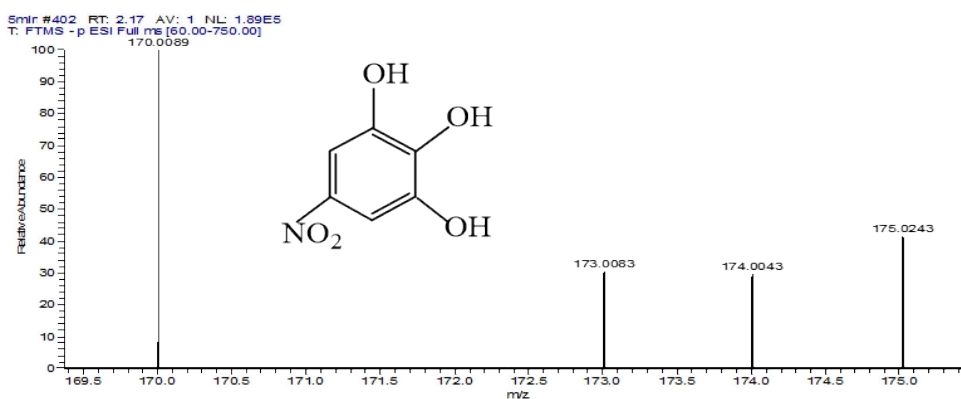

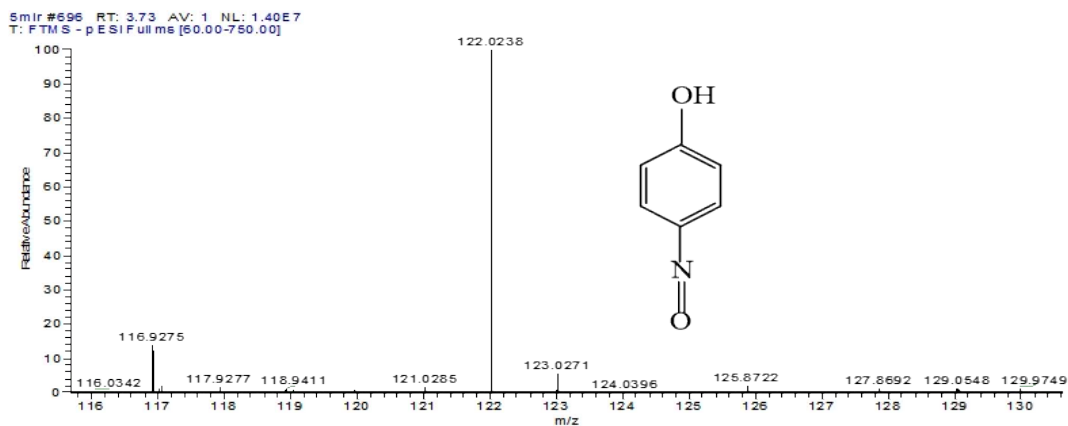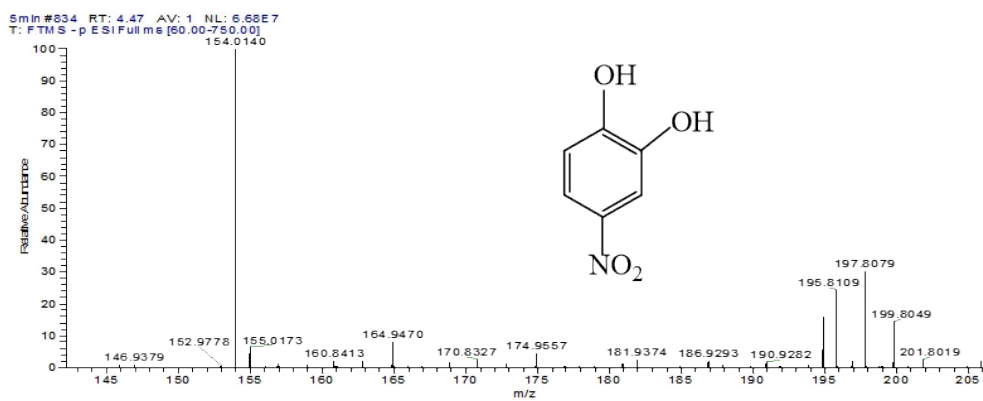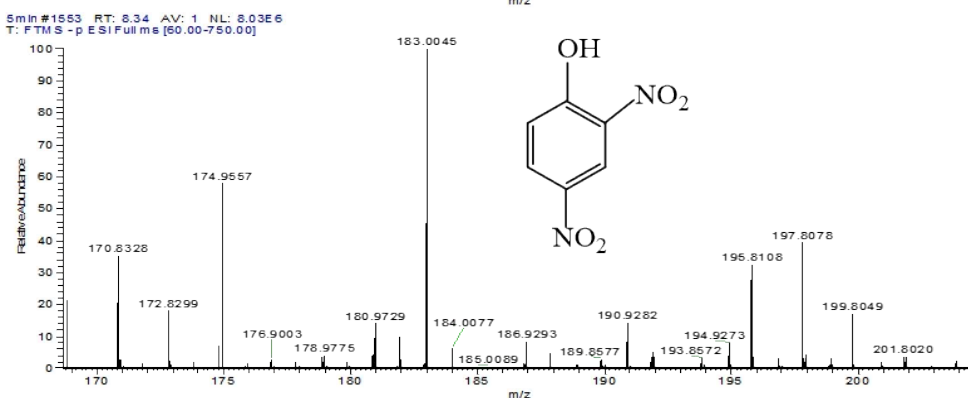

Fig.S6 The LC-HRMS spectra and mass spectrum of PNP intermediates in the nZVI/H<sub>2</sub>O<sub>2</sub>/PDS dual oxidation system.

**Table. S1**

Table S1. Detected degradation intermediates of p-nitrophenol

| No. | Retention time (min) | m/z      | intermediates                |
|-----|----------------------|----------|------------------------------|
| 1   | 2.02                 | 115.0026 | fumaric acid                 |
| 2   | 2.14                 | 88.9869  | oxalic acid                  |
| 3   | 2.14                 | 170.0084 | 5-nitryl-1,2,3-hydroxyquinol |
| 4   | 3.70                 | 122.0236 | p-nitrosophenol              |
| 5   | 4.50                 | 154.0135 | 4-nitrocatachol              |
| 6   | 8.33                 | 183.0036 | 2,4-dinitrophenol            |
